# Supplementary material for: Prognostic Accuracy of the qSOFA Score for In-Hospital Mortality in Elderly Patients with Obstructive Acute Pyelonephritis: A Multi-Institutional Study
Source: MDPI journal article supplement (doi:10.3390/diagnostics11122277), 2021-12-05
Supplement: s1 [file s1]

Table S1. Comparison of baseline characteristics between included and excluded patients

| Variables                                      |                          | Included_n (%)  | Excluded_n (%)  | P value |
|------------------------------------------------|--------------------------|-----------------|-----------------|---------|
| No. of patients                                |                          | 369 (59)        | 252 (41)        |         |
| Sex                                            | Females                  | 258 (70)        | 158 (63)        | 0.060   |
|                                                | Males                    | 111 (30)        | 94 (37)         |         |
| Age (years), median (range)                    |                          | 75 (19-100)     | 71 (17-96)      | 0.002   |
| CCI                                            | 0-1                      | 145 (39)        | 159 (63)        | <0.001  |
|                                                | ≥ 2                      | 224 (61)        | 93 (37)         |         |
| DM                                             | Yes                      | 76 (21)         | 54 (20)         | 0.80    |
|                                                | No                       | 293 (79)        | 198 (75)        |         |
| CVD                                            | Yes                      | 106 (29)        | 46 (17)         | 0.003   |
|                                                | No                       | 263 (71)        | 206 (78)        |         |
| Stroke                                         | Yes                      | 65 (18)         | 30 (11)         | 0.052   |
|                                                | No                       | 304 (82)        | 222 (84)        |         |
| Malignancy                                     | Yes                      | 71 (19)         | 40 (15)         | 0.28    |
|                                                | No                       | 298 (81)        | 212 (80)        |         |
| Immunosuppression                              | Yes                      | 26 (7)          | 12 (5)          | 0.24    |
|                                                | No                       | 343 (93)        | 240 (95)        |         |
| WBC (10 <sup>3</sup> /μl), median (range)      |                          | 12.4 (0.8-61.5) | 11.5 (1.2-39.4) | 0.15    |
| Platelet (10 <sup>4</sup> /μl), median (range) |                          | 15.7 (0.2-57.0) | 19.6 (1.6-66.4) | <0.001  |
| CRP (mg/dl), median (range)                    |                          | 14.3 (0.0-52.1) | 10.6 (0-41.5)   | <0.001  |
| Albumin (g/dl), median (range)                 |                          | 3.1 (1.5-4.9)   | 3.5 (1.7-4.8)   | <0.001  |
| Creatinine (mg/dl), median (range)             |                          | 1.2 (0.3-8.0)   | 1.2 (0.3-10.9)  | 0.81    |
| Midstream urine culture                        | Positive                 | 279 (76)        | 164 (65)        | 0.001   |
|                                                | Negative                 | 80 (22)         | 67 (27)         |         |
|                                                | None                     | 10 (3)          | 21 (8)          |         |
| Blood culture                                  | Positive                 | 143 (39)        | 57 (23)         | <0.001  |
|                                                | Negative                 | 160 (43)        | 59 (23)         |         |
|                                                | None                     | 66 (18)         | 136 (54)        |         |
| Position of obstruction                        | Renal calyx or pelvis    | 9 (2)           | 5 (2)           | <0.001  |
|                                                | Pelvic ureteral junction | 53 (14)         | 24 (10)         |         |
|                                                | Upper ureter             | 168 (45)        | 103 (41)        |         |
|                                                | Mid ureter               | 47 (13)         | 22 (9)          |         |
|                                                | Lower ureter             | 82 (22)         | 63 (25)         |         |
| Laterality                                     | Unknown                  | 10 (3)          | 34 (14)         | 0.15    |
|                                                | Right                    | 165 (45)        | 108 (45)        |         |
|                                                | Left                     | 194 (53)        | 120 (50)        |         |
|                                                | Bilateral                | 10 (3)          | 14 (6)          |         |
| Hydronephrosis                                 | Low grade (0-2)          | 219 (59)        | 115 (46)        | 0.001   |
|                                                | High grade (3-4)         | 145 (40)        | 129 (51)        |         |
|                                                | Unknown                  | 4 (1)           | 8 (3)           |         |
| Cause of obstruction                           | Calculus                 | 344 (93)        | 205 (81)        | <0.001  |
|                                                | Tumor                    | 6 (2)           | 8 (3)           |         |
|                                                | Others                   | 15 (4)          | 38 (15)         |         |
|                                                | Unknown                  | 4 (1)           | 1 (0)           |         |
| Method of drainage                             | Nephrostomy              | 118 (32)        | 19 (8)          | <0.001  |
|                                                | Ureteral stent           | 186 (50)        | 163 (65)        |         |
|                                                | None                     | 65 (18)         | 70 (28)         |         |
| DIC                                            | Yes                      | 93 (25)         | 31 (12)         | <0.001  |
|                                                | No                       | 276 (75)        | 221 (88)        |         |
| ICU admission                                  | Yes                      | 70 (19)         | 5 (2)           |         |
|                                                | No                       | 299 (81)        | 246 (98)        |         |
| In-hospital mortality                          | Yes                      | 25 (7)          | 2 (1)           |         |
|                                                | No                       | 344 (93)        | 249 (99)        |         |
| SIRS, median (range)                           |                          | 2 (0-4)         | 1 (0-4)         | <0.001  |

Values are presented as number (%) or median (range). CCI, Charlson comorbidity index; CRP, C-reactive protein; CVD, cerebrovascular disease; DIC, Disseminated Intravascular Coagulation; DM, diabetes mellitus; ICU, intensive care unit; SIRS, systemic inflammatory response syndrome; WBC, White Blood Cell.

Table S2. Logistic regression analysis for the composite of ICU admission and/or in-hospital mortality

| Variables            |                                     | Univariate<br>P value | Multivariate |          |         |
|----------------------|-------------------------------------|-----------------------|--------------|----------|---------|
|                      |                                     |                       | OR           | 95%CI    | P value |
| Sex                  | Males vs. females                   | 0.49                  |              |          |         |
| Age                  | Elderly vs young patients           | 0.013                 |              |          |         |
| CCI                  | ≥ 2 vs. 0-1                         | 0.001                 |              |          |         |
| DM                   | Yes vs. No                          | 0.65                  |              |          |         |
| CVD                  | Yes vs. No                          | 0.077                 |              |          |         |
| Stroke               | Yes vs. No                          | 0.20                  |              |          |         |
| Malignancy           | Yes vs. No                          | 0.67                  |              |          |         |
| Immunosuppression    | Yes vs. No                          | 1.00                  |              |          |         |
| Cause of obstruction | Calculus vs. Others                 | 0.79                  |              |          |         |
|                      | Tumor vs. Others                    | 0.86                  |              |          |         |
| Laterality           | Right vs. Left                      | 0.46                  |              |          |         |
| Hydronephrosis       | Low grade (0-2) vs High grade (3-5) | 0.22                  |              |          |         |
| CRP                  | ≥ 14.3 vs. < 14.3                   | 0.038                 |              |          |         |
| Platelet             | < 15.7 vs. ≥ 15.7                   | < 0.001               | 2.8          | 1.6-5.0  | < 0.001 |
| WBC                  | ≥ 12.4 vs. < 12.4                   | 0.78                  |              |          |         |
| Cre                  | ≥ 1.2 vs. < 1.2                     | < 0.001               | 1.9          | 1.1-3.4  | 0.024   |
| Drainage             | Nephrostomy vs. None                | 0.027                 |              |          |         |
|                      | Ureteral stent vs. None             | 0.005                 |              |          |         |
| SIRS                 | ≥ 1 vs. 0                           | 0.12                  |              |          |         |
| qSOFA                | ≥ 2 vs. 0-1                         | < 0.001               | 5.7          | 3.3-10.0 | < 0.001 |

CCI, Charlson comorbidity index; CI, confidence interval; CRP, C-reactive protein; CVD, cerebrovascular disease; DM, diabetes mellitus; ICU, intensive care unit; OR, odds ratio; qSOFA, quick Sequential Organ Failure Assessment; SIRS, systemic inflammatory response syndrome; WBC, white blood cell

Table S3. Logistic regression analysis for in-hospital mortality in elderly patients

| Variables            |                                     | Univariate<br>P value | Multivariate |           |         |
|----------------------|-------------------------------------|-----------------------|--------------|-----------|---------|
|                      |                                     |                       | OR           | 95%CI     | P value |
| Sex                  | Males vs. females                   | 0.76                  |              |           |         |
| CCI                  | ≥ 2 vs. 0-1                         | 0.006                 | 8.1          | 1.6-147.4 | 0.008   |
| DM                   | Yes vs. No                          | 0.47                  |              |           |         |
| CVD                  | Yes vs. No                          | 0.96                  |              |           |         |
| Stroke               | Yes vs. No                          | 0.52                  |              |           |         |
| Malignancy           | Yes vs. No                          | 0.41                  |              |           |         |
| Immunosuppression    | Yes vs. No                          | 0.18                  |              |           |         |
| Cause of obstruction | Calculus vs. Others                 | 0.93                  |              |           |         |
|                      | Tumor vs. Others                    | 0.44                  |              |           |         |
| Laterality           | Right vs. Left                      | 0.99                  |              |           |         |
| Hydronephrosis       | Low grade (0-2) vs High grade (3-5) | 0.70                  |              |           |         |
| CRP                  | ≥ 14.3 vs. < 14.3                   | 0.73                  |              |           |         |
| Platelet             | < 15.7 vs. ≥ 15.7                   | 0.31                  |              |           |         |
| WBC                  | ≥ 12.4 vs. < 12.4                   | 0.52                  |              |           |         |
| Cre                  | ≥ 1.2 vs. < 1.2                     | 0.37                  |              |           |         |
| Drainage             | Nephrostomy vs. None                | 0.58                  |              |           |         |
|                      | Ureteral stent vs. None             | 0.63                  |              |           |         |
| SIRS                 | ≥ 1 vs. 0                           | 0.070                 |              |           |         |
| qSOFA                | ≥ 2 vs. 0-1                         | 0.11                  |              |           |         |
| qSOFA                | ≥ 3 vs. 0-2                         | 0.037                 | 3.6          | 1.0-11.3  | 0.047   |

CCI, Charlson comorbidity index; CI, confidence interval; CRP, C-reactive protein; CVD, cerebrovascular disease; DM, diabetes mellitus; OR, odds ratio; qSOFA, quick Sequential Organ Failure Assessment; SIRS, systemic inflammatory response syndrome; WBC, white blood cell

Table S4. List of 25 deceased patients with OAPN

| No. | Age | Sex    | CCI | Drainage       | qSOFA | SIRS | Cause of mortality |
|-----|-----|--------|-----|----------------|-------|------|--------------------|
| 1   | 85  | Male   | 3   | None           | 3     | 4    | OAPN               |
| 2   | 83  | Female | 5   | Ureteral stent | 3     | 4    | OAPN               |
| 3   | 64  | Female | 2   | Nephrostomy    | 3     | 4    | OAPN               |
| 4   | 81  | Female | 4   | Nephrostomy    | 3     | 3    | OAPN               |
| 5   | 88  | Male   | 3   | Ureteral stent | 3     | 3    | Pneumonia          |
| 6   | 83  | Female | 6   | Nephrostomy    | 3     | 2    | OAPN               |
| 7   | 88  | Male   | 2   | Ureteral stent | 2     | 4    | Pneumonia          |
| 8   | 74  | Female | 4   | None           | 2     | 3    | OAPN               |
| 9   | 87  | Male   | 2   | Nephrostomy    | 2     | 2    | Pneumonia          |
| 10  | 75  | Female | 5   | Ureteral stent | 2     | 2    | OAPN               |
| 11  | 94  | Female | 3   | None           | 2     | 2    | OAPN               |
| 12  | 73  | Female | 1   | Ureteral stent | 2     | 2    | OAPN               |
| 13  | 91  | Female | 3   | None           | 2     | 2    | OAPN               |
| 14  | 71  | Female | 4   | Nephrostomy    | 2     | 1    | OAPN               |
| 15  | 43  | Male   | 3   | Ureteral stent | 1     | 3    | OAPN               |
| 16  | 80  | Female | 6   | None           | 1     | 3    | Liver failure      |
| 17  | 75  | Male   | 5   | Ureteral stent | 1     | 3    | Malignancy         |
| 18  | 78  | Female | 5   | Ureteral stent | 1     | 2    | OAPN               |
| 19  | 84  | Female | 6   | Ureteral stent | 1     | 2    | Cardiovascular     |
| 20  | 97  | Female | 2   | Ureteral stent | 1     | 1    | Pneumonia          |
| 21  | 84  | Female | 3   | Ureteral stent | 0     | 3    | OAPN               |
| 22  | 82  | Female | 0   | Ureteral stent | 0     | 2    | OAPN               |
| 23  | 82  | Male   | 8   | Ureteral stent | 0     | 1    | OAPN               |
| 24  | 92  | Female | 6   | Ureteral stent | 0     | 1    | Pneumonia          |
| 25  | 91  | Female | 5   | Nephrostomy    | 0     | 1    | Pneumonia          |

CCI, Charlson comorbidity index; OAPN, obstructive acute pyelonephritis; qSOFA, quick

Sequential Organ Failure Assessment; SIRS, systemic inflammatory response syndrome
