# Supplementary material for: Prognostic Accuracy of the qSOFA Score for In-Hospital Mortality in Elderly Patients with Obstructive Acute Pyelonephritis: A Multi-Institutional Study
Source: MDPI journal article supplement (doi:10.3390/diagnostics11122277), 2021-12-05
Supplement: s1 [file s1]

Figure S1

(A)

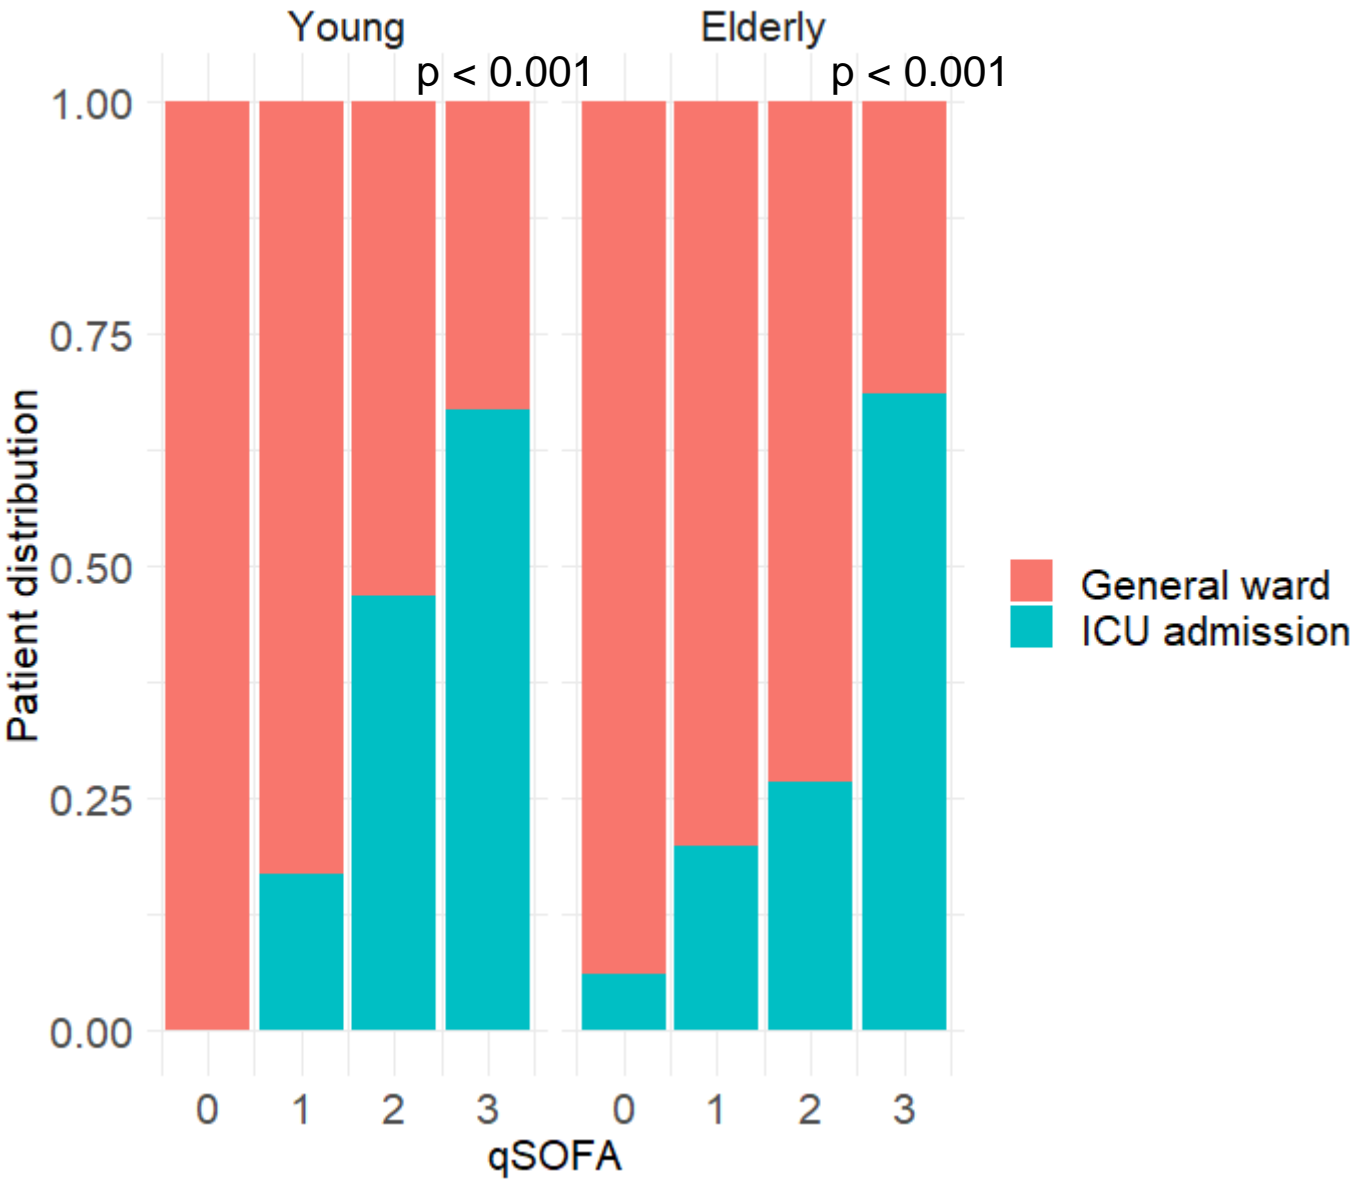

(B)

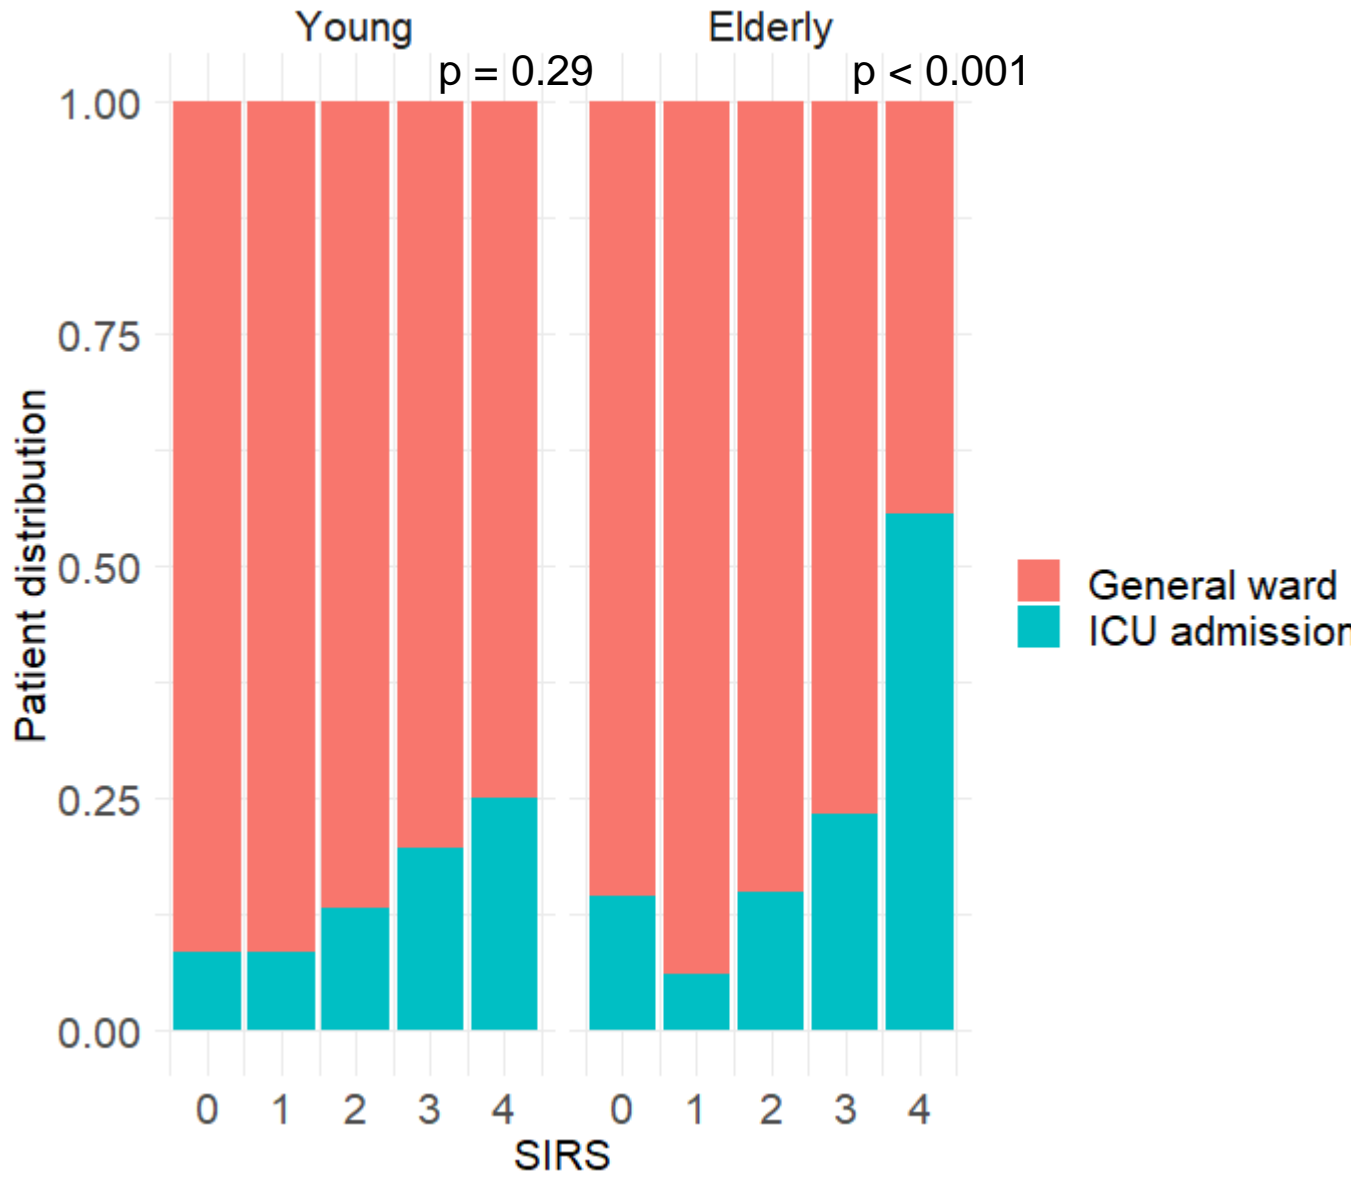

Distribution of patients who were admitted to the ICU by qSOFA and SIRS scores. A, distribution by qSOFA score in young (*left*) and elderly (*right*) patients. B, distribution by SIRS score in young (*left*) and elderly (*right*) patients.

Figure S2

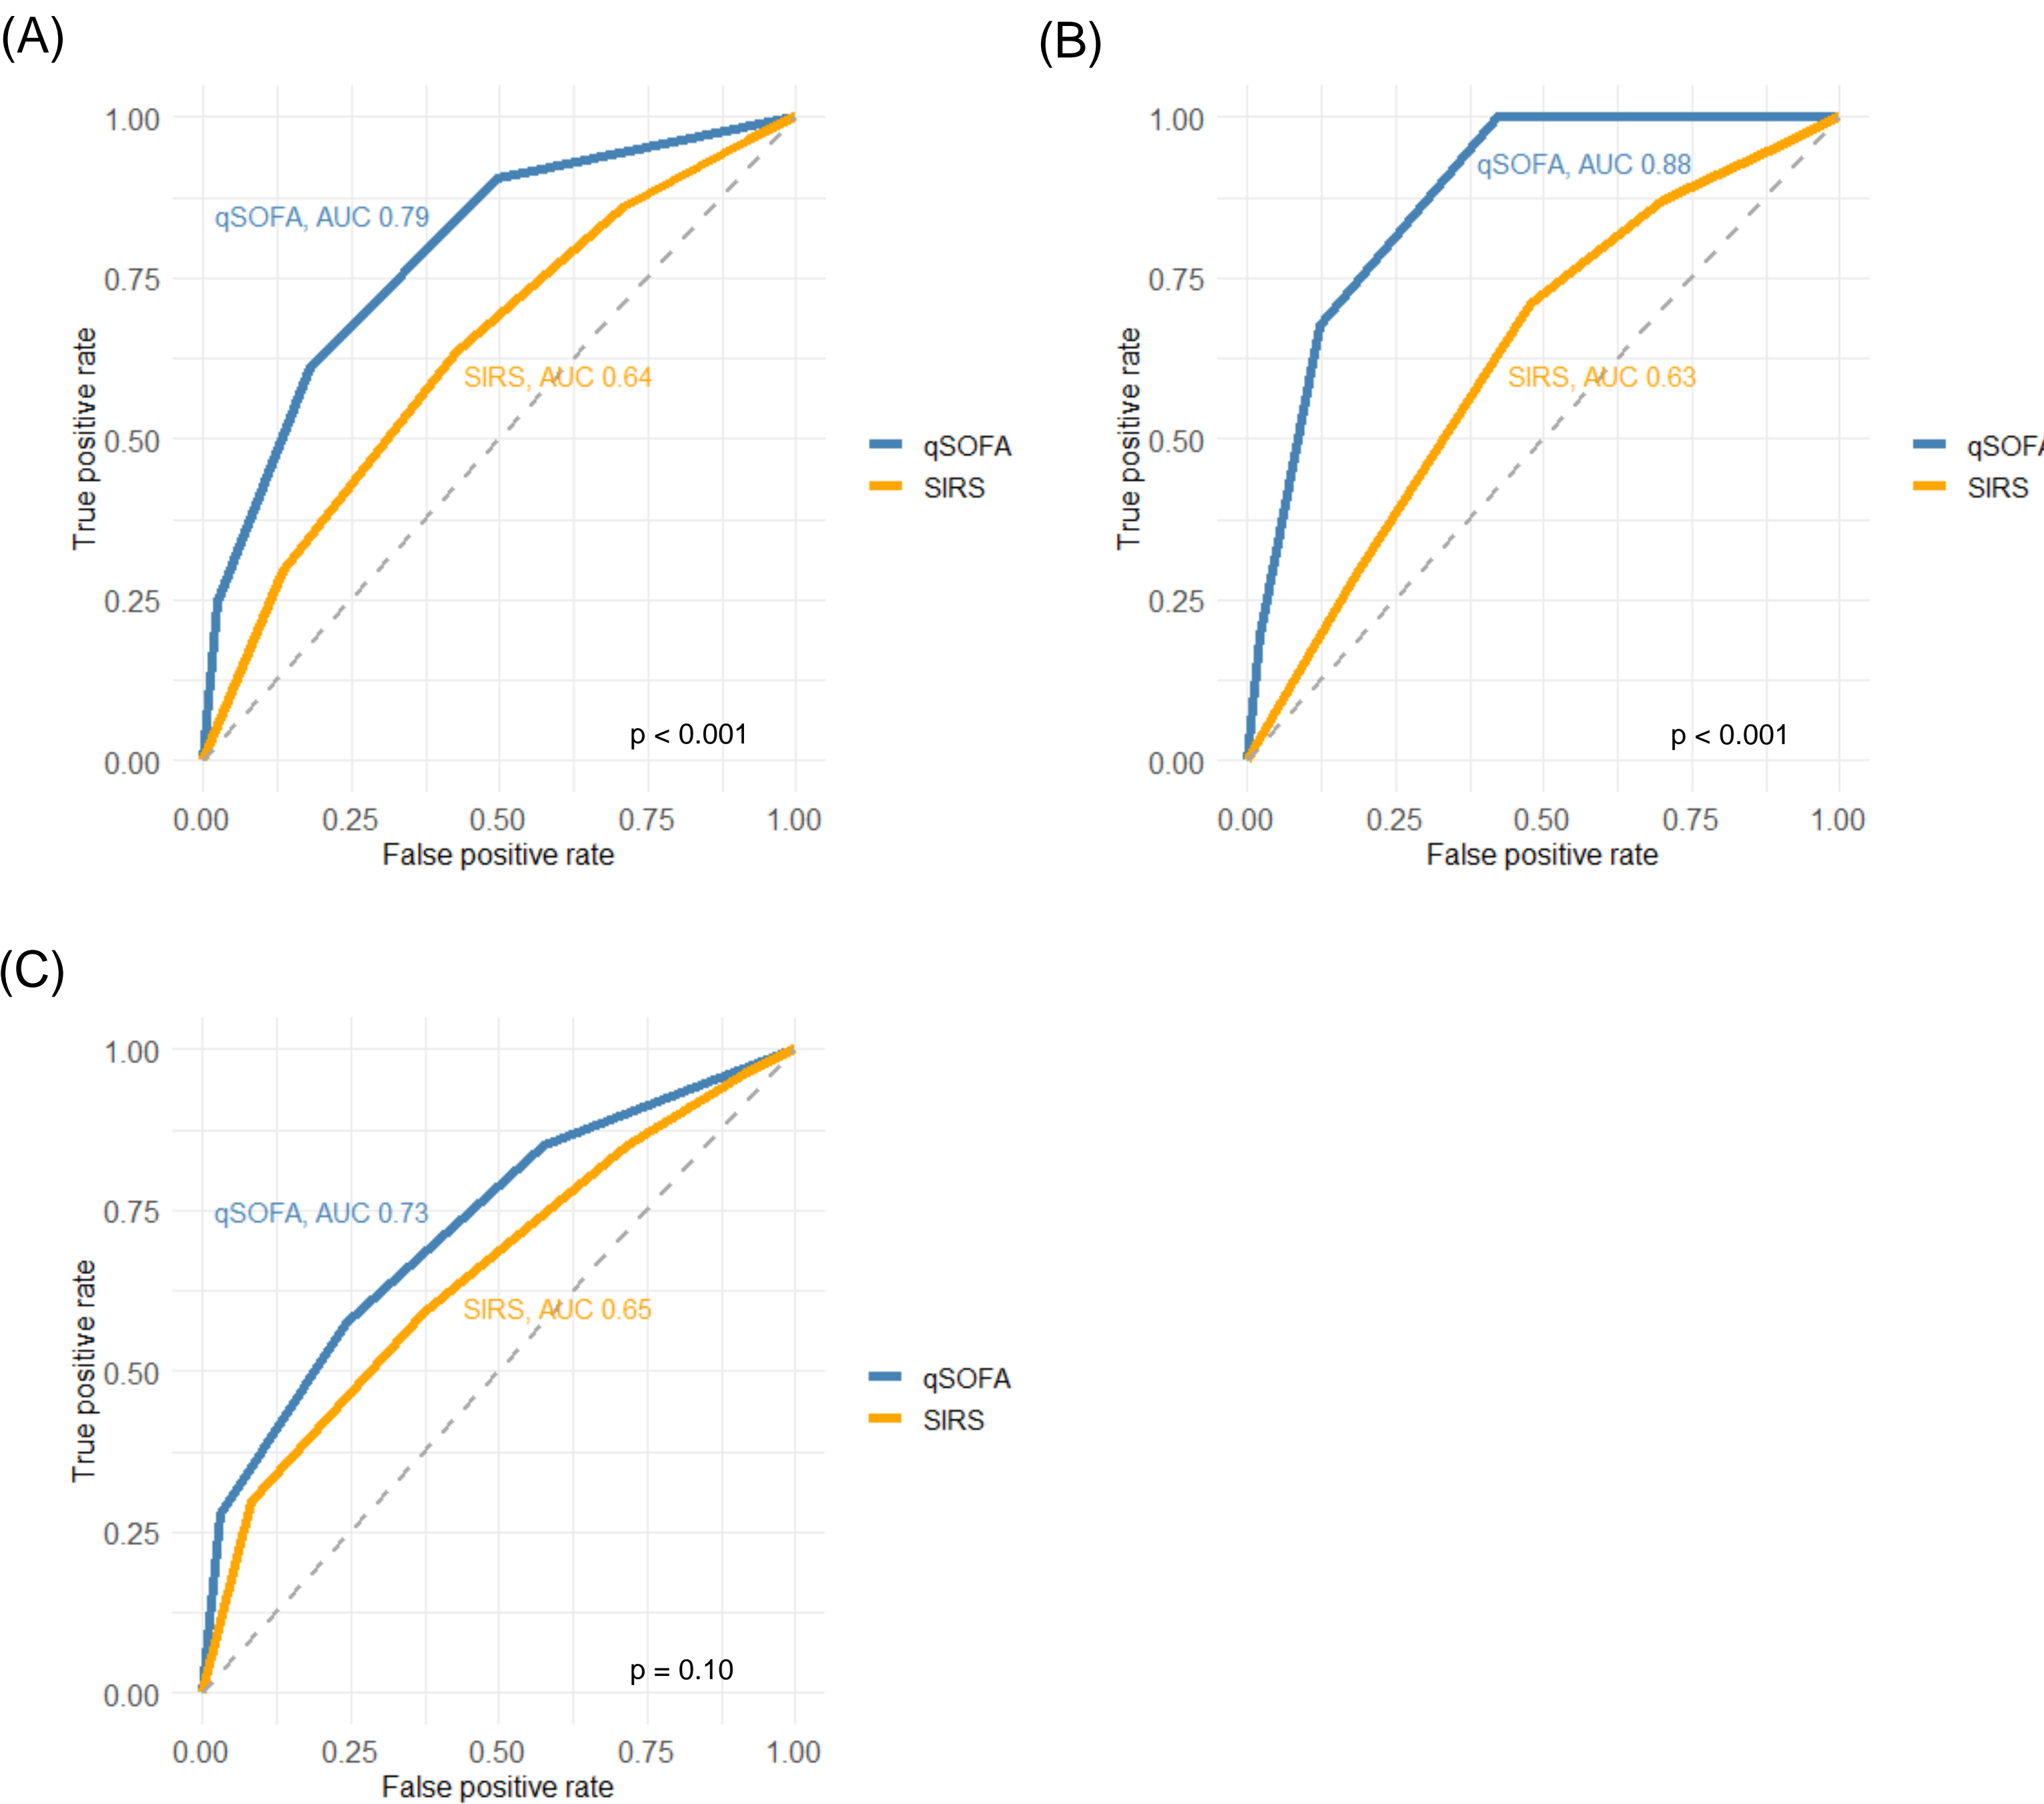

ROC curves of the qSOFA and SIRS scores in predicting the composition of ICU admission and/or in-hospital mortality in total (A), young (B), and elderly (C) patients.
